# Supplementary material for: Rare earth upconversion luminescent composite based on energy transfer for specific and sensitive detection of cysteine
Source: Royal Society of Chemistry journal article supplement (doi:10.1039/d2an01994a), 2023-01-01
Supplement: d2an01994a1.pdf [file d2an01994a1.pdf]

# Supporting Information

## Rare earth upconversion luminescent composite based on energy transfer for specific and sensitive detection of cysteine

Yulian Zhu, Xiaomei Guo, Xiao Ma, Kai Liu, Yuting Han, Yongquan Wu\*, and Xun Li\*

Key Laboratory of Organo-Pharmaceutical Chemistry of Jiangxi Province, School of Chemistry and Chemical Engineering, Gannan Normal University, Ganzhou, 341000, P. R. China, E-mail: wyq@gnnu.edu.cn; gnsylixun@163.com

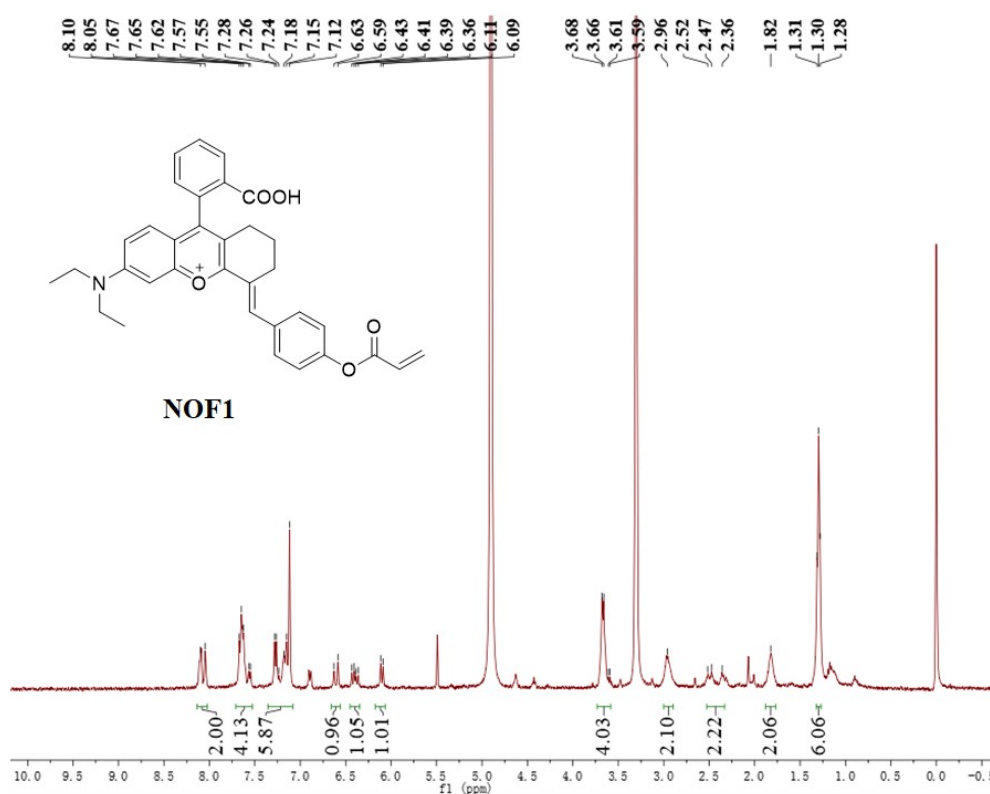

**Figure S1.** <sup>1</sup>H NMR of NOF1 in CD<sub>3</sub>OD

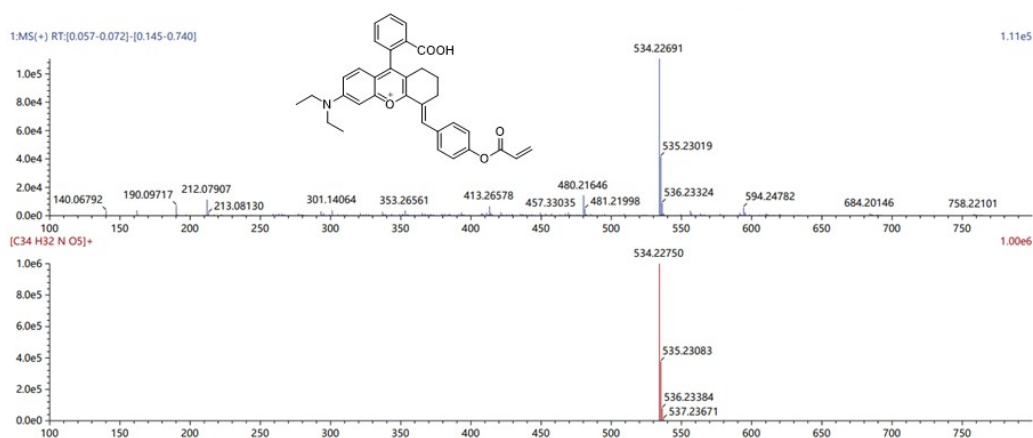

**Figure S2.** HR-MS spectrum of NOF1

**Table S1.** Elemental semi-quantitative analysis of nanoparticles

| Sample        | Na (Wt.%) | F (Wt.%) | Y (Wt.%) | Yb (Wt.%) | Er (Wt.%) |
|---------------|-----------|----------|----------|-----------|-----------|
| Core          | 7.54      | 35.56    | 37.32    | 17.72     | 1.86      |
| UCNP          | 8.63      | 39.95    | 45.45    | 5.52      | 0.45      |
| UCNP-PEG      | 8.14      | 39.11    | 46.63    | 5.12      | 1.00      |
| UCNP-PEG-NOF1 | 7.84      | 39.54    | 47.09    | 4.63      | 0.90      |

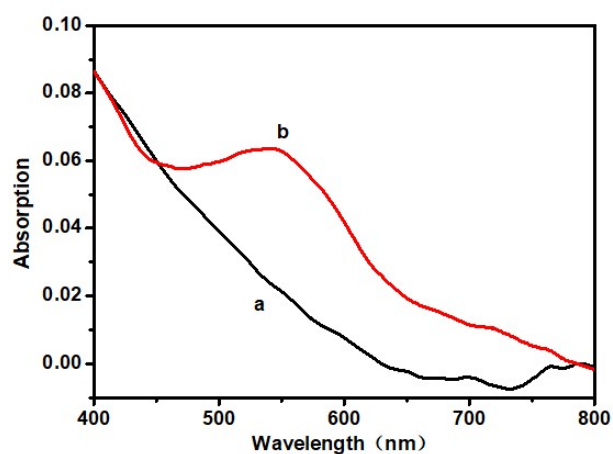

**Figure S3.** The UV-Vis spectra of (a) UCNP-PEG and (b) UCNP-PEG-NOF1

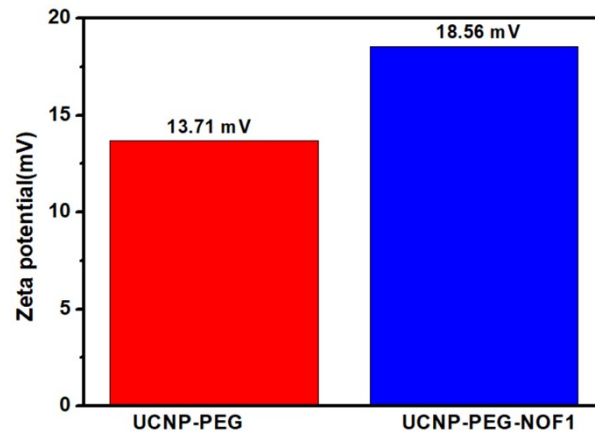

**Figure S4.** Zeta potentials of UCNP-PEG and UCNP-PEG-NOF1

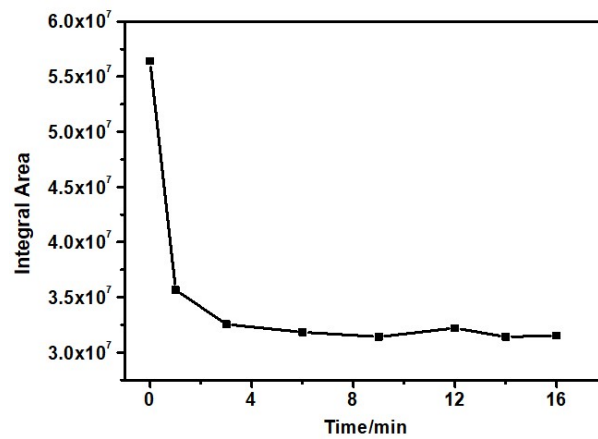

**Figure S5.** The variation of emission peak area with time at  $660 \pm 20$  nm after the addition of  $200 \mu\text{M}$  Cys to UCNP-PEG-NOF1

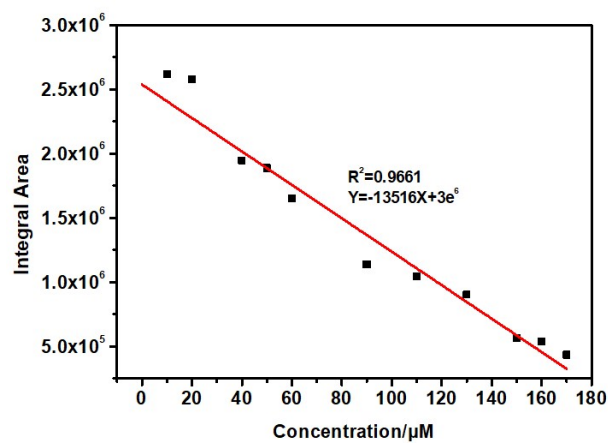

**Figure S6.** The integral area at  $660 \pm 20$  nm as a function of Cys concentration

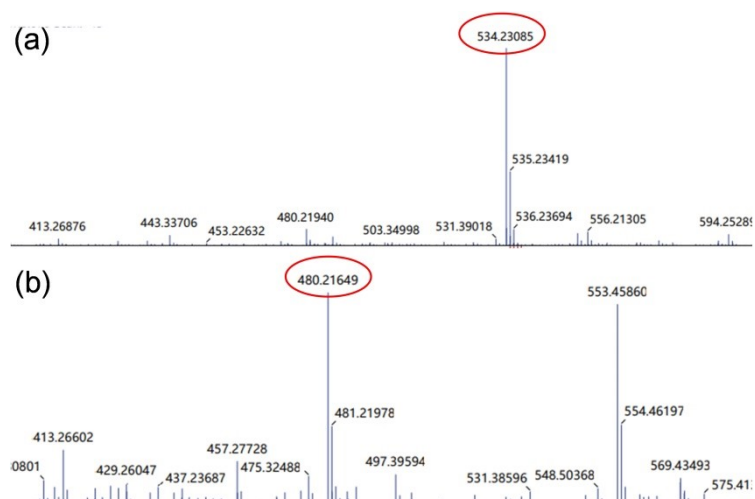

**Figure S7.** HR-MS of (a) NOF1 and (b) product of UCNP-PEG-NOF1 reacted with Cys

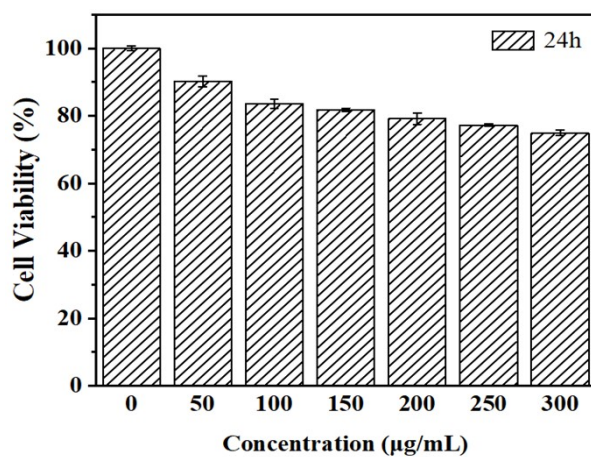

**Figure S8.** MTT assays of MCF-7 cells incubated with UCNP-PEG-NOF1 at different concentrations for 24 h
